# Supplementary material
Source: Elsevier journal article supplement (https://www.sciencedirect.com/science/article/pii/S2531043721001306)
Supplement: mmc1 [file S2531043721001306:mmc1.pdf]

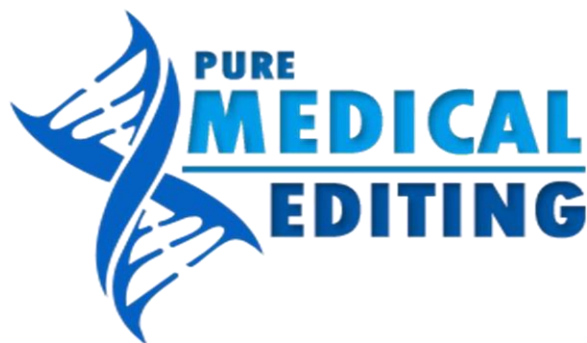

## *Certificate of English Editing*

*This document certifies that the manuscript listed below was edited for proper English language, grammar, punctuation, and spelling by the expert staff at Pure Medical Editing.*

### ***Manuscript Title:***

*Translation, Cross-cultural Adaptation, and Reliability and Validity Test of the Turkish Version of the Duke Activity Status Index in Patients with Pulmonary Hypertension*

### ***Certificate No:***

*2021-0520-01*

### ***Author***

*Dr. Goksen Kuran*

*This certificate may be verified by emailing [puremedicalediting@gmail.com](mailto:puremedicalediting@gmail.com). Documents receiving this certificate should be prepared for publication. The author has the ability to accept or reject our suggestions for changes and can make changes after the editing process is complete, all of which can adversely affect the quality of the text after the editing process.*

David F. Chapman BSc (Hons)

27 Arlington Place

Winchester, England

SO23 7TR
